# Supplementary material for: Pore-forming mechanisms and sodium-ion-storage performances in a porous Na3V2(PO4)3/C composite cathode
Source: Royal Society of Chemistry journal article supplement (doi:10.1039/d3dt00365e), 2023-01-01
Supplement: d3dt00365e1.pdf [file d3dt00365e1.pdf]

## Supplementary information

### **Pore forming mechanisms and sodium ion storage performances in porous $\text{Na}_3\text{V}_2(\text{PO}_4)_3/\text{C}$ composite cathode**

Zhaoyang Wang <sup>a\*</sup>, Jiaxuan Han <sup>a</sup>, Dong Wang <sup>a</sup>, Lingyang Liu <sup>a</sup>, Wenjing Shi <sup>a</sup>, Fangyu Xiong <sup>b,c\*</sup>, Haizheng Tao <sup>c\*</sup>

<sup>a</sup> Shandong Provincial Key Laboratory of Chemical Energy Storage and Novel Cell Technology, School of Chemistry and chemical Engineering, Liaocheng University, Liaocheng, 252059, P.R. China

E-mail: [wzy9218@126.com](mailto:wzy9218@126.com)

<sup>b</sup> Department of Physics, City University of Hong Kong, Tat Chee Avenue, Kowloon, Hong Kong, China.

E-mail: [fxiong@cityu.edu.hk](mailto:fxiong@cityu.edu.hk)

<sup>c</sup> State Key Laboratory of Silicate Materials for Architectures, Wuhan University of Technology, Wuhan, 430070, China.

E-mail: [thz@whut.edu.cn](mailto:thz@whut.edu.cn)

**Keywords:** Surfactant assisted molding strategy, Solvent regulation, Tunable porous structure,  $\text{Na}_3\text{V}_2(\text{PO}_4)_3$ ,

Sodium ion batteries.

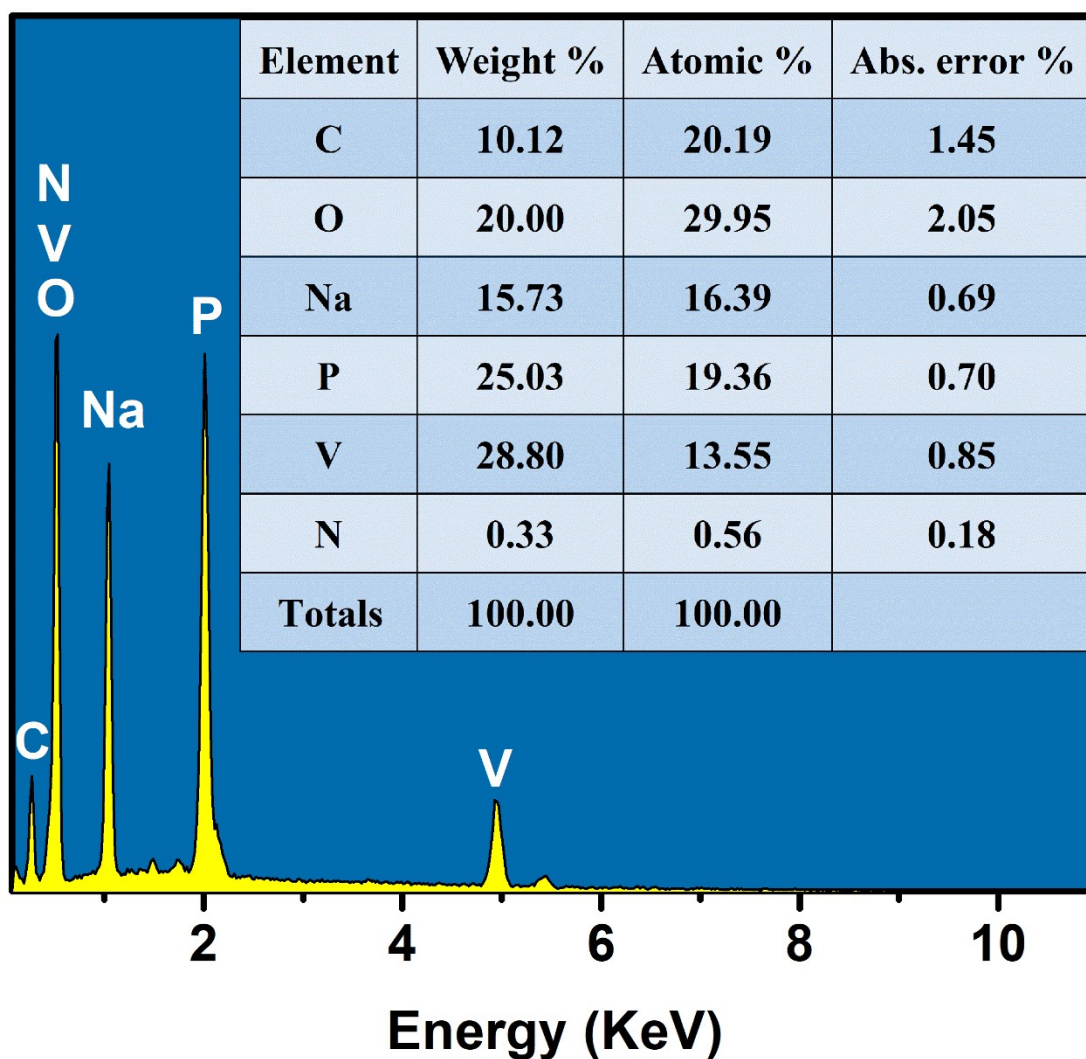

Figure S1. EDX spectrum of NVP/C-2 cathode material.

After calcination at 800 °C, vanadium in NVP was oxidized from trivalent to pentavalent. Each mole of NVP reacts with 1 mole of oxygen molecule, and the weight of NVP increases by about 7 wt% after oxidation reaction. The carbon content of NVP/C can be calculated by following equation:

$$(100 - x) \times (100 + y) = z$$

Where x is the carbon content of NVP/C sample. y is the weight increase caused by oxidation (wt%). z is the mass percentage of NVP/C sample at 750 °C in the TGA curve. As shown in Figure S2, the carbon contents of NVP/C-0, NVP/C-1, NVP/C-2, NVP/C-3, NVP/C-4 and NVP/C-5 sample are calculated to be 2.1 wt%, 4.3 wt%, 7.0 wt%, 6.3 wt%, 5.5 wt% and 4.8 wt%, respectively.

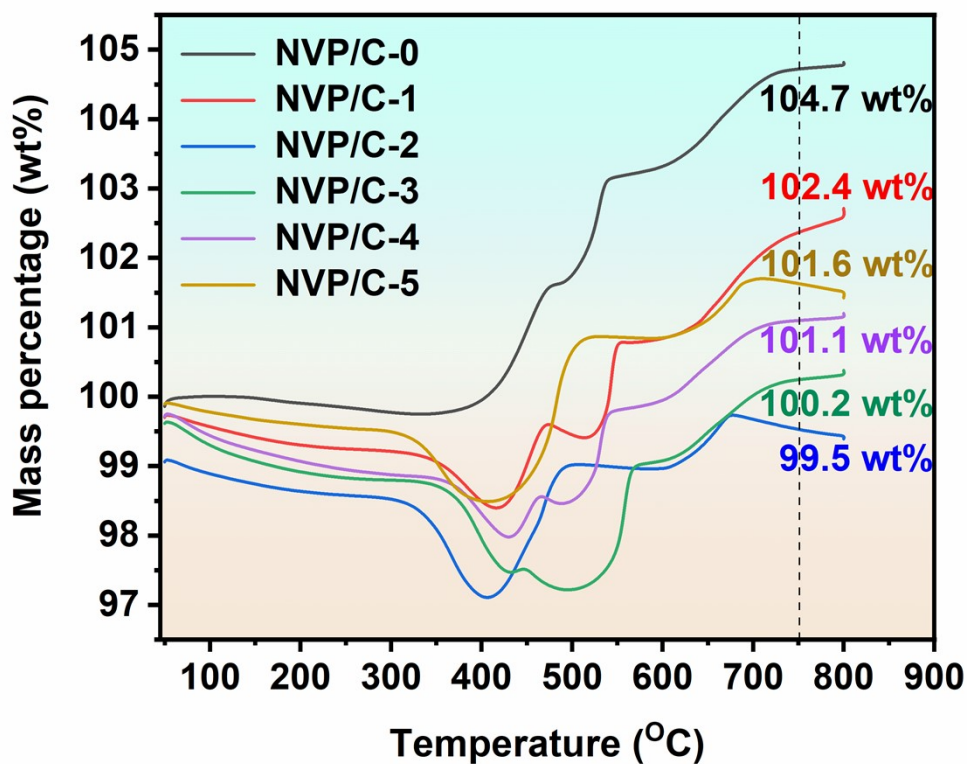

Figure S2. TGA curves of the NVP/C-0, NVP/C-1, NVP/C-2, NVP/C-3, NVP/C-4 and NVP/C-5 samples in air atmosphere.

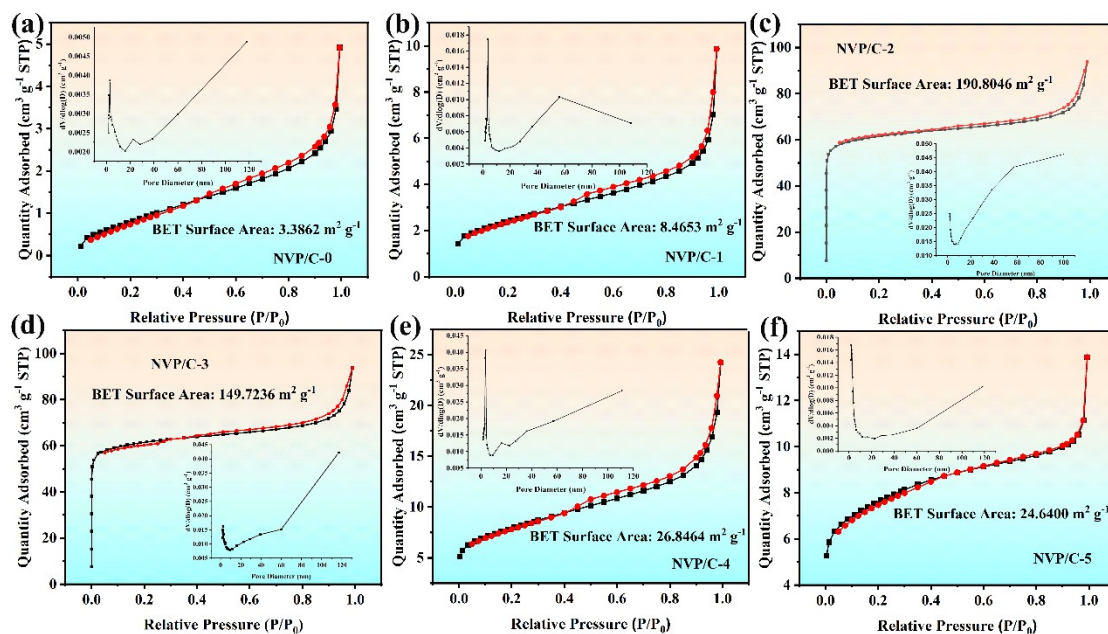

Figure S3. The Nitrogen adsorption-desorption isotherms and embedded the Barrent-Joyner-Halenda pore-size distribution curves. (a) NVP/C-0, (b) NVP/C-1, (c) NVP/C-2, (d) NVP/C-3 (e) NVP/C-4 and (f) NVP/C-5.

Table S1. Pore structural information of as-synthesized NVP/C composite cathodes.

| Sample  | Surface area (m <sup>2</sup> g <sup>-1</sup> ) | Pore volume (cm <sup>3</sup> g <sup>-1</sup> ) | Average pore size (nm) |
|---------|------------------------------------------------|------------------------------------------------|------------------------|
| NVP/C-0 | 3.3862                                         | 7.6210×10 <sup>-3</sup>                        | 9.0019                 |
| NVP/C-1 | 8.4653                                         | 1.5293×10 <sup>-2</sup>                        | 7.2261                 |
| NVP/C-2 | 190.8046                                       | 1.4539×10 <sup>-1</sup>                        | 3.0479                 |
| NVP/C-3 | 149.7236                                       | 1.2642×10 <sup>-1</sup>                        | 3.1017                 |
| NVP/C-4 | 26.8464                                        | 3.7605×10 <sup>-2</sup>                        | 3.4909                 |
| NVP/C-5 | 24.6400                                        | 2.1504×10 <sup>-2</sup>                        | 5.6030                 |

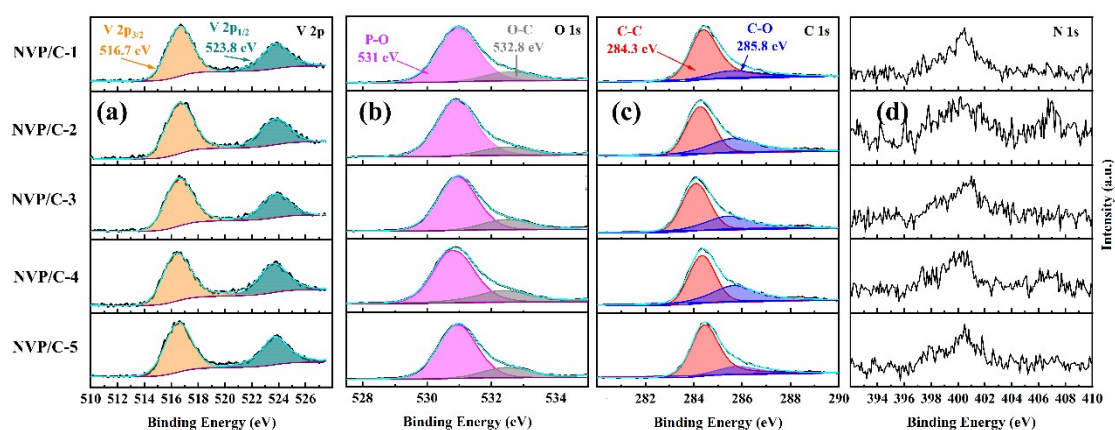

Figure S4. XPS survey spectra of NVP/C-1, NVP/C-2, NVP/C-3, NVP/C-4 and NVP/C-5. (a) V 2p, (b) O 1s, (c) C 1s and (d) N 1s.

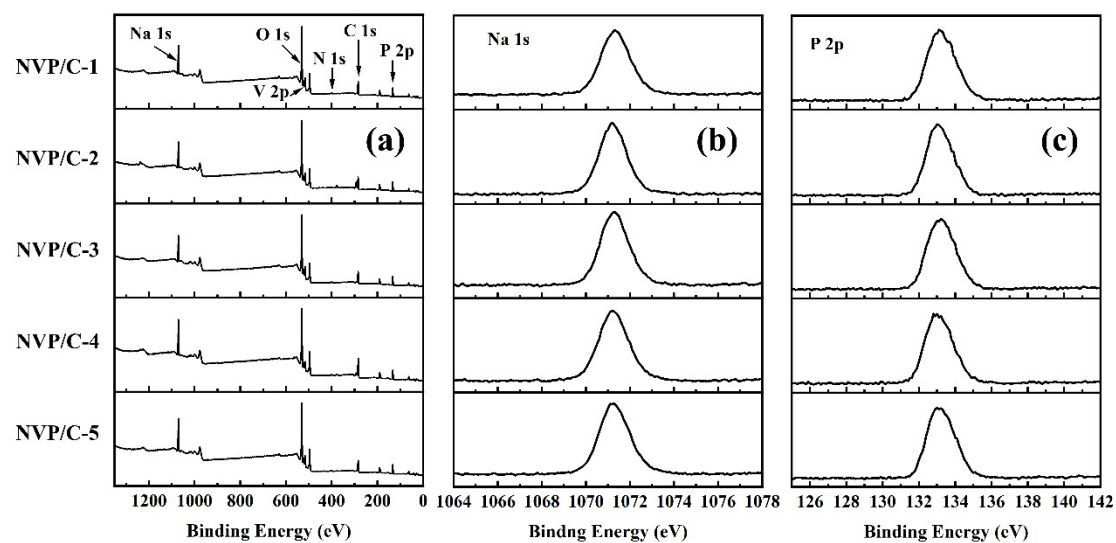

Figure S5. XPS survey spectrum of NVP/C-1, NVP/C-2, NVP/C-3, NVP/C-4 and NVP/C-5. (a) survey spectra, (b) Na 1s, (c) P 2p.
